**Table S1. Effects of season, social rank and age on the antioxidant capacity and the oxidative damage of male mandrills.**

|             | Antioxidant capacity        | Oxidative damage            |
|-------------|-----------------------------|-----------------------------|
|             | N = 49                      | N = 48                      |
| Season      | $F_{1,47} = 0.53, P = 0.48$ | $F_{1,46} = 9.27, P = 0.01$ |
| Rank        | $F_{2,46} = 0.23, P = 0.80$ | $F_{2,45} = 1.51, P = 0.27$ |
| Age         | $F_{1,47} = 0, P = 0.98$    | $F_{1,46} = 0.31, P = 0.59$ |
| Season×rank | $F_{2,46} = 0.77, P = 0.48$ | $F_{2,45} = 7.39, P = 0.01$ |
| Rank×age    | $F_{2,46} = 0.59, P = 0.57$ | $F_{2,45} = 0.50, P = 0.63$ |
| Age×season  | $F_{2,46} = 0, P = 0.98$    | $F_{2,45} = 5.90, P = 0.04$ |

**Table S2. Effects of season, social rank and age on the antioxidant capacity and the oxidative damage of female mandrills.**

|             | Antioxidant capacity<br>N = 45-47* | Oxidative damage<br>N = 43-45* |
|-------------|------------------------------------|--------------------------------|
| Season      | $F_{1, 43} = 9.14, P = 0.01$       | $F_{2, 42} = 10.20, P = 0.008$ |
| Rank        | $F_{2, 42} = 0.11, P = 0.89$       | $F_{2, 40} = 0.10, P = 0.91$   |
| Age         | $F_{1, 43} = 1.61, P = 0.23$       | $F_{1, 43} = 0.13, P = 0.72$   |
| Season×rank | $F_{2, 42} = 0.58, P = 0.59$       | $F_{2, 40} = 0.70, P = 0.53$   |
| Rank×age    | $F_{2, 42} = 2.16, P = 0.17$       | $F_{2, 40} = 0.98, P = 0.42$   |
| Age×season  | $F_{2, 42} = 0.26, P = 0.63$       | $F_{2, 40} = 1.13, P = 0.31$   |

\*N varies because two females had unknown rank and were included when the variable rank was removed.
